# Supplementary material for: Computational studies of the cationic aluminium(chloro) hydroxides by quantum chemical ab initio methods
Source: Royal Society of Chemistry journal article supplement (doi:10.1039/b506949a), 2005-01-01
Supplement: b506949a-esi.pdf [file b506949a-esi.pdf]

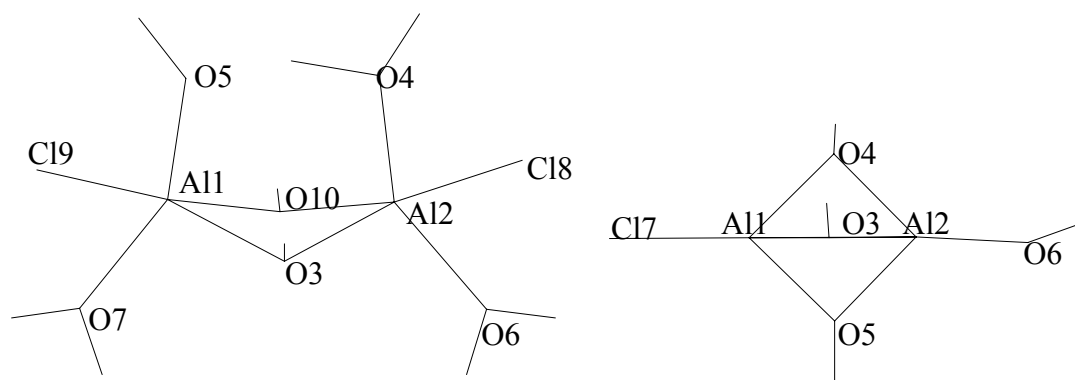

**Fig. S1.** Wireframe model of the minimum energy structure of  $[\text{Al}_2\text{O}_6\text{H}_9\text{Cl}_2]^{1+}$  and  $[\text{Al}_2\text{O}_4\text{H}_4\text{Cl}]^{1+}$ .

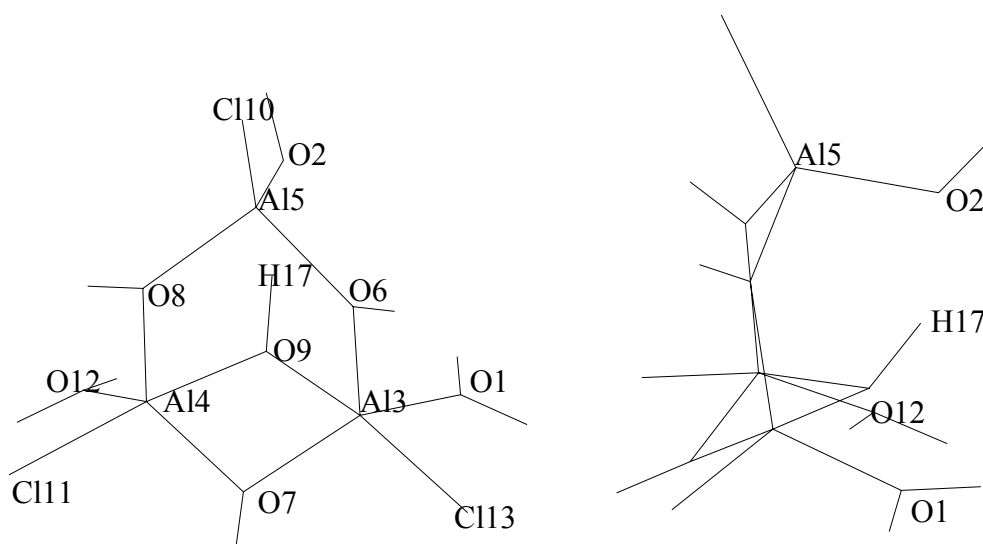

**Fig. S2.** Wireframe model of the minimum energy structure of  $[\text{Al}_3\text{O}_7\text{H}_9\text{Cl}_3]^{1+}$  from two different angles.

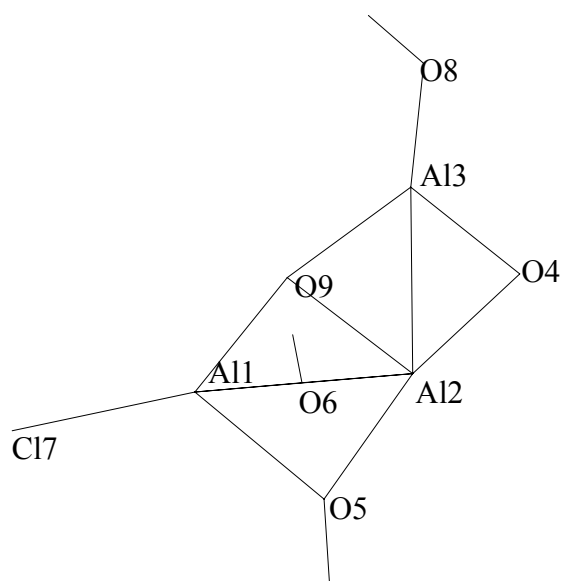

**Fig. S3.** Wireframe model of the minimum energy structure of [Al<sub>3</sub>O<sub>5</sub>H<sub>3</sub>Cl]<sup>1+</sup>.

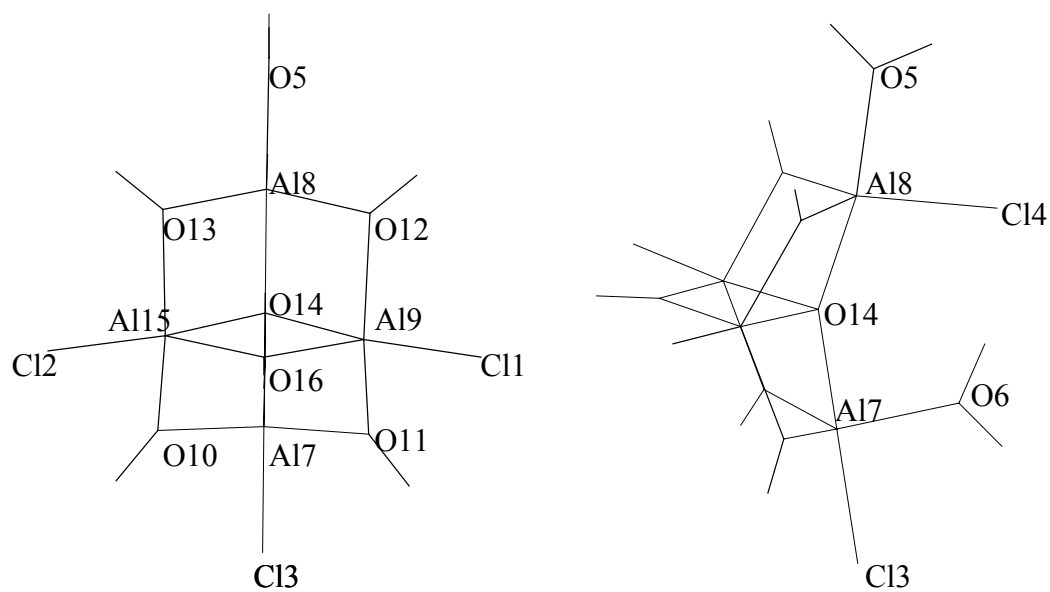

**Fig. S4.** Wireframe model of the minimum energy structure of [Al<sub>4</sub>O<sub>8</sub>H<sub>9</sub>Cl<sub>4</sub>]<sup>1+</sup> from two different angles.

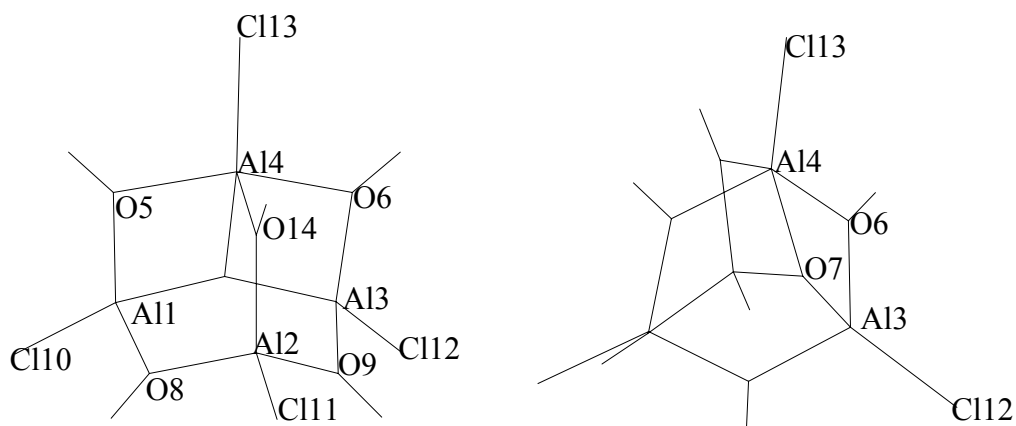

**Fig. S5.** Wireframe model of the minimum energy structure of  $[\text{Al}_4\text{O}_6\text{H}_5\text{Cl}_4]^{1+}$  from two different angles.

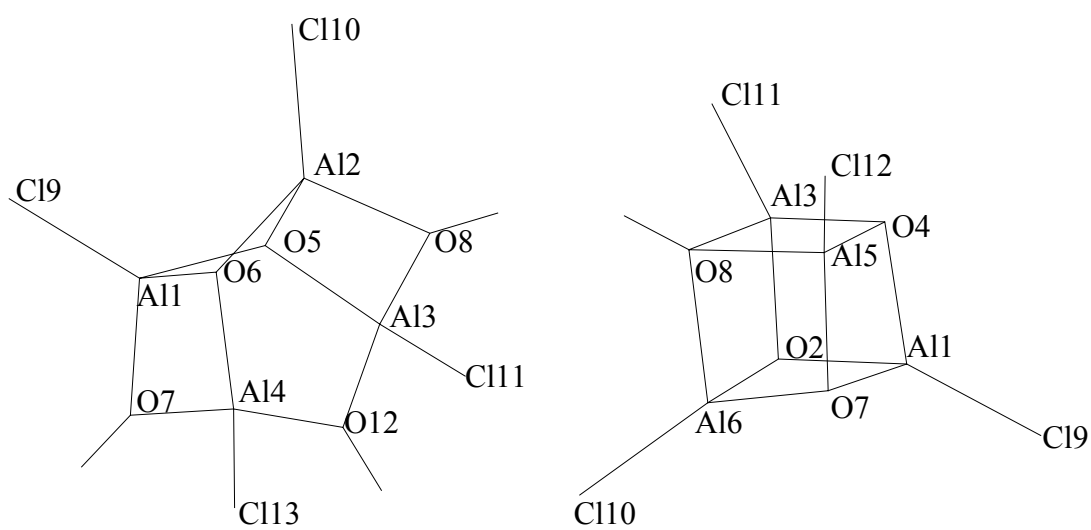

**Fig. S6.** Wireframe model of the minimum energy structures of  $[\text{Al}_4\text{O}_5\text{H}_3\text{Cl}_4]^{1+}$  and  $[\text{Al}_4\text{O}_4\text{HCl}_4]^{1+}$ .

**Table S1.** Geometrical properties of minimum energy structures shown in Fig. S1-S6.

| $[\text{Al}_2\text{O}_6\text{H}_9\text{Cl}_2]^{1+}$ |        | $[\text{Al}_2\text{O}_4\text{H}_4\text{Cl}]^{1+}$ |        | $[\text{Al}_3\text{O}_7\text{H}_9\text{Cl}_3]^{1+}$ |        | $[\text{Al}_3\text{O}_5\text{H}_3\text{Cl}]^{1+}$ |        | $[\text{Al}_4\text{O}_8\text{H}_9\text{Cl}_4]^{1+}$ |        | $[\text{Al}_4\text{O}_6\text{H}_5\text{Cl}_4]^{1+}$ |        | $[\text{Al}_4\text{O}_5\text{H}_3\text{Cl}_4]^{1+}$ |        | $[\text{Al}_4\text{O}_4\text{HCl}_4]^{1+}$ |        |
|-----------------------------------------------------|--------|---------------------------------------------------|--------|-----------------------------------------------------|--------|---------------------------------------------------|--------|-----------------------------------------------------|--------|-----------------------------------------------------|--------|-----------------------------------------------------|--------|--------------------------------------------|--------|
| Bond                                                | length | Bond                                              | length | Bond                                                | length | Bond                                              | length | Bond                                                | length | Bond                                                | length | Bond                                                | length | Bond                                       | length |
| R <sub>Al1-07</sub>                                 | 1.96   | R <sub>Al1-C17</sub>                              | 2.06   | R <sub>Al3-07</sub>                                 | 1.86   | R <sub>Al1-C17</sub>                              | 2.06   | R <sub>Al8-O12</sub>                                | 1.84   | R <sub>Al1-05</sub>                                 | 1.82   | R <sub>Al1-05</sub>                                 | 1.83   | R <sub>Al1-02</sub>                        | 1.89   |
| R <sub>Al1-C19</sub>                                | 2.17   | R <sub>Al1-05</sub>                               | 1.87   | R <sub>Al3-09</sub>                                 | 1.90   | R <sub>Al1-05</sub>                               | 1.92   | R <sub>Al8-O13</sub>                                | 1.84   | R <sub>Al1-07</sub>                                 | 1.79   | R <sub>Al1-06</sub>                                 | 1.92   | R <sub>Al1-04</sub>                        | 1.89   |
| R <sub>Al1-05</sub>                                 | 1.81   | R <sub>Al1-04</sub>                               | 1.88   | R <sub>Al3-01</sub>                                 | 1.95   | R <sub>Al1-06</sub>                               | 1.96   | R <sub>Al8-O14</sub>                                | 1.86   | R <sub>Al1-08</sub>                                 | 1.88   | R <sub>Al1-07</sub>                                 | 1.83   | R <sub>Al1-07</sub>                        | 1.89   |
| R <sub>Al1-010</sub>                                | 1.87   | R <sub>Al1-03</sub>                               | 1.87   | R <sub>Al3-C113</sub>                               | 2.17   | R <sub>Al1-09</sub>                               | 1.79   | R <sub>Al8-O5</sub>                                 | 2.01   | R <sub>Al1-C110</sub>                               | 2.08   | R <sub>Al1-C19</sub>                                | 2.07   | R <sub>Al1-C19</sub>                       | 2.06   |
| R <sub>Al1-03</sub>                                 | 1.95   | R <sub>Al2-05</sub>                               | 1.88   | R <sub>Al3-06</sub>                                 | 1.86   | R <sub>Al2-05</sub>                               | 1.85   | R <sub>Al8-C14</sub>                                | 2.18   | R <sub>Al2-08</sub>                                 | 1.85   | R <sub>Al2-05</sub>                                 | 1.93   | R <sub>Al3-02</sub>                        | 1.84   |
| R <sub>Al2-06</sub>                                 | 1.95   | R <sub>Al2-04</sub>                               | 1.88   | R <sub>Al4-07</sub>                                 | 1.85   | R <sub>Al2-06</sub>                               | 1.84   | R <sub>Al7-06</sub>                                 | 1.92   | R <sub>Al2-09</sub>                                 | 1.85   | R <sub>Al2-06</sub>                                 | 1.83   | R <sub>Al3-04</sub>                        | 1.84   |
| R <sub>Al2-03</sub>                                 | 1.92   | R <sub>Al2-03</sub>                               | 1.88   | R <sub>Al4-09</sub>                                 | 1.91   | R <sub>Al2-09</sub>                               | 1.98   | R <sub>Al7-010</sub>                                | 1.87   | R <sub>Al2-014</sub>                                | 1.82   | R <sub>Al2-08</sub>                                 | 1.83   | R <sub>Al3-08</sub>                        | 2.03   |
| R <sub>Al2-010</sub>                                | 1.85   | R <sub>Al2-06</sub>                               | 1.66   | R <sub>Al4-012</sub>                                | 1.94   | R <sub>Al2-04</sub>                               | 1.71   | R <sub>Al7-011</sub>                                | 1.87   | R <sub>Al2-C111</sub>                               | 2.09   | R <sub>Al2-C110</sub>                               | 2.07   | R <sub>Al3-C111</sub>                      | 2.06   |
| R <sub>Al2-C18</sub>                                | 2.17   | -                                                 | -      | R <sub>Al4-C111</sub>                               | 2.17   | R <sub>Al3-04</sub>                               | 1.76   | R <sub>Al7-014</sub>                                | 1.92   | R <sub>Al3-06</sub>                                 | 1.82   | R <sub>Al3-05</sub>                                 | 1.81   | R <sub>Al5-04</sub>                        | 1.84   |
| R <sub>Al2-04</sub>                                 | 1.87   | -                                                 | -      | R <sub>Al4-08</sub>                                 | 1.86   | R <sub>Al3-09</sub>                               | 1.79   | R <sub>Al7-C13</sub>                                | 2.16   | R <sub>Al3-07</sub>                                 | 1.79   | R <sub>Al3-08</sub>                                 | 1.86   | R <sub>Al5-07</sub>                        | 1.84   |
| -                                                   | -      | -                                                 | -      | R <sub>Al5-06</sub>                                 | 1.85   | R <sub>Al3-08</sub>                               | 1.67   | R <sub>Al9-011</sub>                                | 1.87   | R <sub>Al3-09</sub>                                 | 1.87   | R <sub>Al3-012</sub>                                | 1.87   | R <sub>Al5-08</sub>                        | 2.03   |
| -                                                   | -      | -                                                 | -      | R <sub>Al5-08</sub>                                 | 1.86   | -                                                 | -      | R <sub>Al9-012</sub>                                | 1.91   | R <sub>Al3-C112</sub>                               | 2.08   | R <sub>Al3-C111</sub>                               | 2.07   | R <sub>Al5-C112</sub>                      | 2.06   |
| -                                                   | -      | -                                                 | -      | R <sub>Al5-C110</sub>                               | 2.10   | -                                                 | -      | R <sub>Al9-014</sub>                                | 1.99   | R <sub>Al4-05</sub>                                 | 1.94   | R <sub>Al4-06</sub>                                 | 1.81   | R <sub>Al6-02</sub>                        | 1.84   |
| -                                                   | -      | -                                                 | -      | R <sub>Al5-02</sub>                                 | 1.75   | -                                                 | -      | R <sub>Al9-016</sub>                                | 1.87   | R <sub>Al4-06</sub>                                 | 1.94   | R <sub>Al4-07</sub>                                 | 1.86   | R <sub>Al6-07</sub>                        | 1.84   |
| -                                                   | -      | -                                                 | -      | R <sub>H17-02</sub>                                 | 1.68   | -                                                 | -      | R <sub>Al9-C11</sub>                                | 2.14   | R <sub>Al4-07</sub>                                 | 1.93   | R <sub>Al4-012</sub>                                | 1.87   | R <sub>Al6-08</sub>                        | 2.03   |
| -                                                   | -      | -                                                 | -      | -                                                   | -      | -                                                 | -      | R <sub>Al15-010</sub>                               | 1.87   | R <sub>Al4-014</sub>                                | 1.91   | R <sub>Al4-C113</sub>                               | 2.07   | R <sub>Al6-C110</sub>                      | 2.06   |
| -                                                   | -      | -                                                 | -      | -                                                   | -      | -                                                 | -      | R <sub>Al15-013</sub>                               | 1.91   | R <sub>Al4-C113</sub>                               | 2.12   | -                                                   | -      | -                                          | -      |
| -                                                   | -      | -                                                 | -      | -                                                   | -      | -                                                 | -      | R <sub>Al15-014</sub>                               | 1.99   | -                                                   | -      | -                                                   | -      | -                                          | -      |
| -                                                   | -      | -                                                 | -      | -                                                   | -      | -                                                 | -      | R <sub>Al15-016</sub>                               | 1.87   | -                                                   | -      | -                                                   | -      | -                                          | -      |
| -                                                   | -      | -                                                 | -      | -                                                   | -      | -                                                 | -      | R <sub>Al15-C12</sub>                               | 2.14   | -                                                   | -      | -                                                   | -      | -                                          | -      |
